# Supplementary material for: Trends in Appendicitis and Perforated Appendicitis Prevalence in Children in the United States, 2001-2015
Source: PubMed Central journal article supplement (PMC7599446; doi:10.1001/jamanetworkopen.2020.23484), 2020-10-30
Supplement: jamanetwopen-e2023484-s001.pdf [file jamanetwopen-e2023484-s001.pdf]

## Supplemental Online Content

Gray DT, Mizrahi T. Trends in appendicitis and perforated appendicitis prevalence in children in the United States, 2001-2015. *JAMA Netw Open.* 2020;3(10):e2023484.  
doi:10.1001/jamanetworkopen.2020.23484

**eAppendix.** Established *ICD-9-CM* Principal or Secondary Discharge Diagnosis Codes

**eReference.**

This supplemental material has been provided by the authors to give readers additional information about their work.

## **eAppendix. Established<sup>1</sup> ICD-9-CM principal or secondary discharge diagnosis codes**

### Appendicitis

- 540.0 acute appendicitis with peritonitis
- 540.1 abscess of appendix
- 540.9 acute appendicitis not otherwise specified
- 541 appendicitis not otherwise specified

### Appendiceal Perforation

- 540.0 acute appendicitis with peritonitis
- 540.1 abscess of appendix

## **eReference**

1. Agency for Healthcare Research and Quality. Pediatric quality indicator 17 (PDI 17): perforated appendix admission rate. Published August 2018. Accessed August 2, 2020.  
[https://www.qualityindicators.ahrq.gov/Downloads/Modules/PDI/V60/TechSpecs/PDI\\_17\\_Perforated\\_Appendix\\_Admission\\_Rate.pdf](https://www.qualityindicators.ahrq.gov/Downloads/Modules/PDI/V60/TechSpecs/PDI_17_Perforated_Appendix_Admission_Rate.pdf)
